# Supplementary material for: Association of the Inferior Alveolar Nerve Position and Nerve Injury: A Systematic Review and Meta-Analysis
Source: MDPI journal article supplement (doi:10.3390/healthcare10091782), 2022-09-16
Supplement: s1 [file s1]

**Table S3.** Results of quality assessment using the Newcastle-Ottawa Scale for a meta-analysis.

| Study        | Selection                       |                                 | Comparability         |                        |                                                                            | Exposure                  |                                                     |                   |
|--------------|---------------------------------|---------------------------------|-----------------------|------------------------|----------------------------------------------------------------------------|---------------------------|-----------------------------------------------------|-------------------|
|              | Is the case definition adequate | Representativeness of the cases | Selection of Controls | Definition of Controls | Comparability of cases and controls on the basis of the design or analysis | Ascertainment of exposure | Same method of ascertainment for cases and controls | Non-Response rate |
| Kubota, 2020 |                                 | ×                               |                       | ×                      | ×                                                                          | ×                         | ×                                                   |                   |

× means getting a star in this category, the comparability category can be awarded ×× mostly.
