# Supplementary material for: Association of the Inferior Alveolar Nerve Position and Nerve Injury: A Systematic Review and Meta-Analysis
Source: MDPI journal article supplement (doi:10.3390/healthcare10091782), 2022-09-16
Supplement: s1 [file s1]

**Table S2.** Results of quality assessment using the Newcastle-Ottawa Scale for a meta-analysis.

| Study          | Selection                                |                                     |                           | Comparability                                                            |                                                                 | Outcome               |                                                 |                                  |
|----------------|------------------------------------------|-------------------------------------|---------------------------|--------------------------------------------------------------------------|-----------------------------------------------------------------|-----------------------|-------------------------------------------------|----------------------------------|
|                | Representativeness of the exposed cohort | Selection of the non-exposed cohort | Ascertainment of exposure | Demonstration that outcome of interest was not present at start of study | Comparability of cohorts on the basis of the design or analysis | Assessment of outcome | Was follow-up long enough for outcomes to occur | Adequacy of follow up of cohorts |
| Hasegawa,2013  |                                          | ×                                   | ×                         | ×                                                                        | ×                                                               | ×                     | ×                                               | ×                                |
| Jun,2013       | ×                                        | ×                                   | ×                         | ×                                                                        | ×                                                               |                       |                                                 | ×                                |
| Nakayama,2009  | ×                                        | ×                                   | ×                         | ×                                                                        | ×                                                               | ×                     |                                                 | ×                                |
| Neves,2012     | ×                                        | ×                                   | ×                         | ×                                                                        | ×                                                               | ×                     |                                                 | ×                                |
| Tachinami,2017 | ×                                        | ×                                   | ×                         | ×                                                                        | ×                                                               | ×                     | ×                                               | ×                                |
| Qi, 2019       |                                          | ×                                   | ×                         | ×                                                                        | ×                                                               | ×                     | ×                                               | ×                                |
| ueda,2012      | ×                                        | ×                                   | ×                         | ×                                                                        | ×                                                               | ×                     |                                                 | ×                                |
| shiratori,2013 |                                          | ×                                   | ×                         | ×                                                                        | ×                                                               | ×                     | ×                                               |                                  |

× means getting a star in this category, the comparability category can be awarded ××mostly.
