# Supplementary material for: Association of the Inferior Alveolar Nerve Position and Nerve Injury: A Systematic Review and Meta-Analysis
Source: MDPI journal article supplement (doi:10.3390/healthcare10091782), 2022-09-16
Supplement: s1 [file s1]

**Table S1.** Search strategy

| Database                                                 | Search strategy                                                                                                                                                                                                                                                                                                                                                                                                                                                                                                                                                                                                                                                                                                                                                                                                                                                                                                                                                                                                                                                                                                                                                                           |
|----------------------------------------------------------|-------------------------------------------------------------------------------------------------------------------------------------------------------------------------------------------------------------------------------------------------------------------------------------------------------------------------------------------------------------------------------------------------------------------------------------------------------------------------------------------------------------------------------------------------------------------------------------------------------------------------------------------------------------------------------------------------------------------------------------------------------------------------------------------------------------------------------------------------------------------------------------------------------------------------------------------------------------------------------------------------------------------------------------------------------------------------------------------------------------------------------------------------------------------------------------------|
| Cochrane Central Register of Controlled Trials (CENTRAL) | #1 MeSH descriptor: [Mandibular Nerve Injuries] explode all trees<br>#2 (Injury, Mandibular Nerve): ti,ab,kw<br>#3 (Mandibular Nerve Injury): ti,ab,kw<br>#4 (Nerve Injury, Mandibular): ti,ab,kw<br>#5 (Inferior Alveolar Nerve Injuries): ti,ab,kw<br>#6 (Lateral Pterygoid Nerve Injuries): ti,ab,kw<br>#7 (Masseteric Nerve Injuries): ti,ab,kw<br>#8 (Injury, Masseteric Nerve): ti,ab,kw<br>#9 (Auriculotemporal Nerve Injuries): ti,ab,kw<br>#10 (Auriculotemporal Nerve Injury): ti,ab,kw<br>#11 (Injury, Auriculotemporal Nerve): ti,ab,kw<br>#12 (Nerve Injuries, Auriculotemporal): ti,ab,kw<br>#13 (Nerve Injury, Auriculotemporal): ti,ab,kw<br>#14 (Deep Temporal Nerve Injuries): ti,ab,kw<br>#15 (Mental Nerve Injuries): ti,ab,kw<br>#16 (Injury, Mental Nerve): ti,ab,kw<br>#17 (Mental Nerve Injury): ti,ab,kw<br>#18 (Buccal Nerve Injuries): ti,ab,kw<br>#19 (Injury, Buccal Nerve): ti,ab,kw<br>#20 (Nerve Injury, Buccal): ti,ab,kw<br>#21 (Buccal Nerve Injury): ti,ab,kw<br>#22#1 OR #2 OR #3 OR #4 OR #5 OR #6 OR #7 OR #8 OR #9 OR #10 OR #11 OR #12 OR #13 OR #14 OR #15 OR #16 OR #17 OR #18 OR #19 OR #20 OR #21<br>#23(canal): ti,ab,kw<br>#24 #22 AND #23 |
| Journals@Ovid                                            | Mandibular Nerve Injuries or Injury, Mandibular Nerve or Mandibular Nerve Injury or Nerve Injury, Mandibular or Inferior Alveolar Nerve Injuries or Lateral Pterygoid Nerve Injuries and canal                                                                                                                                                                                                                                                                                                                                                                                                                                                                                                                                                                                                                                                                                                                                                                                                                                                                                                                                                                                            |
| web of science                                           | TS = (Mandibular Nerve Injuries OR Injury, Mandibular Nerve OR Mandibular Nerve Injury OR Nerve Injury, Mandibular OR Inferior Alveolar Nerve Injuries) AND TS = canal                                                                                                                                                                                                                                                                                                                                                                                                                                                                                                                                                                                                                                                                                                                                                                                                                                                                                                                                                                                                                    |
